# Supplementary material for: CeO2 facets control: from single (100) to multiple
Source: Royal Society of Chemistry journal article supplement (doi:10.1039/c9ra09731g), 2020-01-01
Supplement: c9ra09731g1.pdf [file c9ra09731g1.pdf]

## **Supporting Information**

### **CeO<sub>2</sub> facets control: from single (100) to multiple**

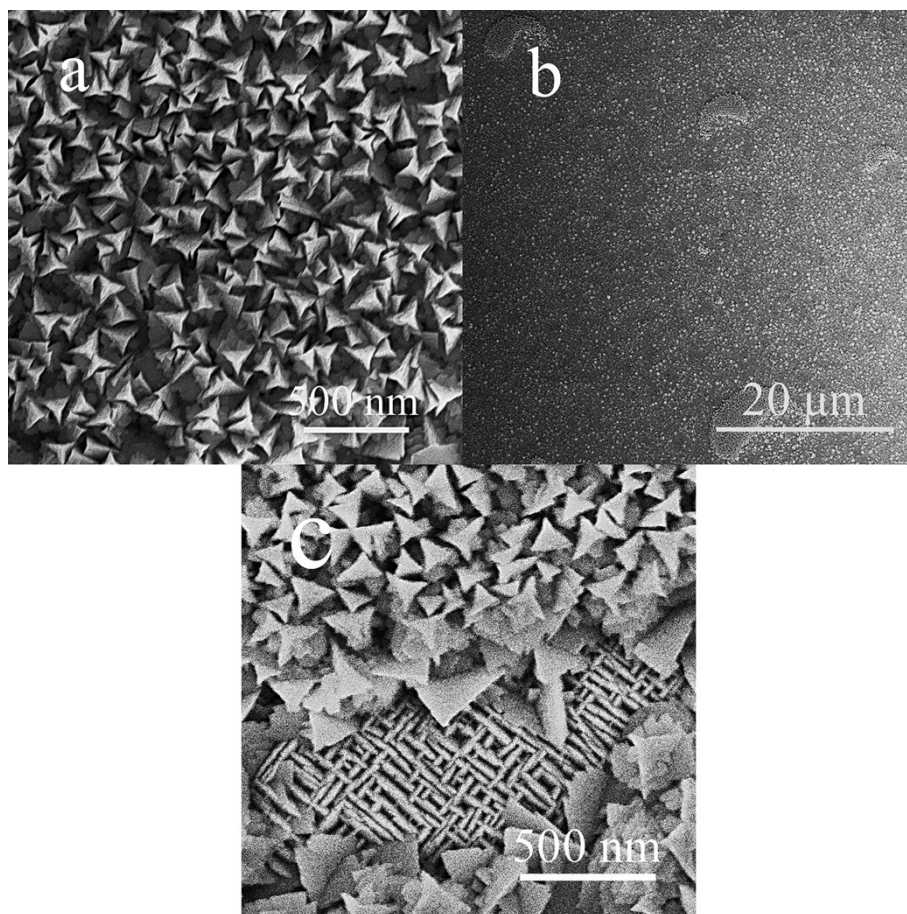

**Figure S1.** (a) SEM images of star-like nanosheets mentioned in Figure 2d. (b, c) SEM images of S<sub>50</sub>.

Figure S1 shows the SEM images of S<sub>50</sub>. From figure S1(c) it can be seen that the star-like nanosheets were grown on the top of the triangle-like nanosheets. No star-like nanosheets existed on the top of the nanorods. It can be further demonstrated that the (111) facet of CeO<sub>2</sub> grown on the top of (110) facet, not the (100) facet or the substrate.

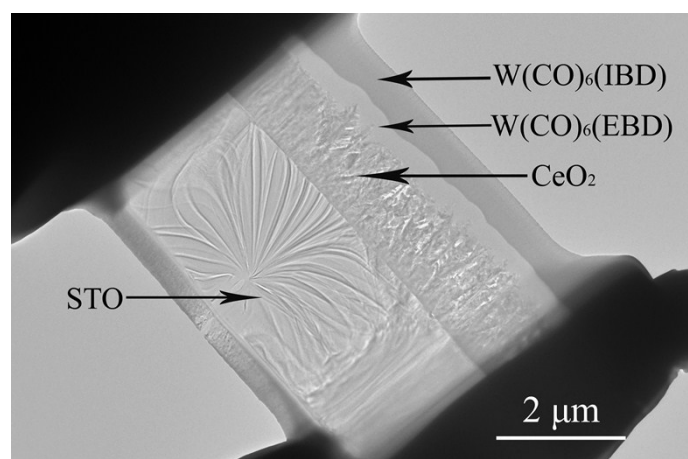

**Figure S2.** SEM images of cross-section of S<sub>50</sub>.

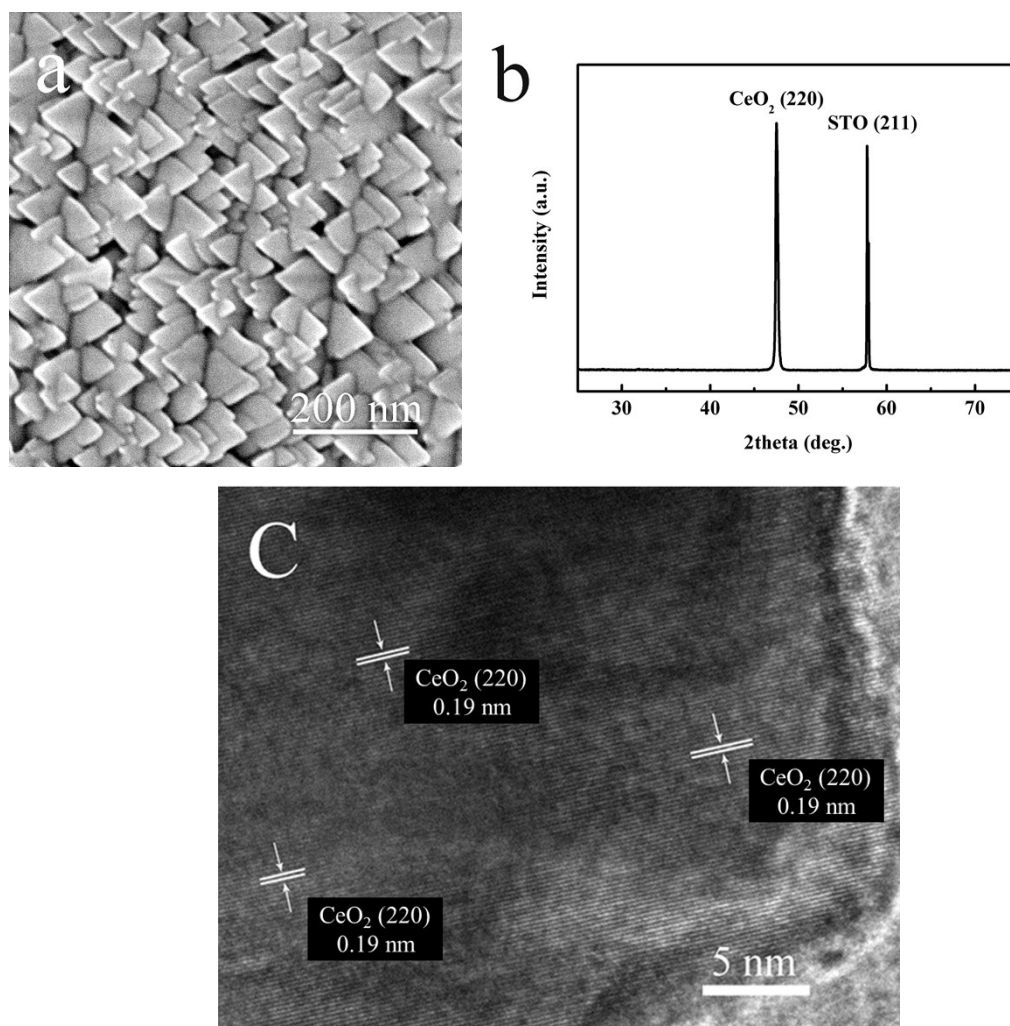

**Figure S3.** (a) SEM image of CeO<sub>2</sub> film on STO (211) substrate. (b) XRD pattern of CeO<sub>2</sub> film on STO (211) substrate. (c) HRTEM image of CeO<sub>2</sub> film on STO (211) substrate.

The CeO<sub>2</sub> film on STO (211) was prepared to confirm the terminated facet of the triangle-like nanosheets. From the SEM image (figure S3(a)), it is shown that the morphology is just like triangle-like nanosheets. According to the XRD pattern (figure S3(b)) and HRTEM (figure S3(c)), it can be confirmed that the orientation is along (110) facet.

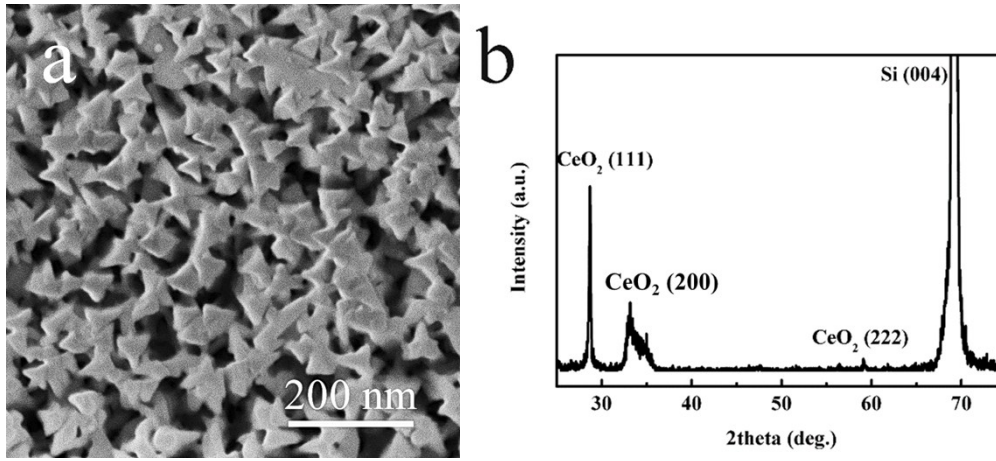

**Figure S4.** (a) SEM and (b) XRD of CeO<sub>2</sub> film on Si (001) substrate.

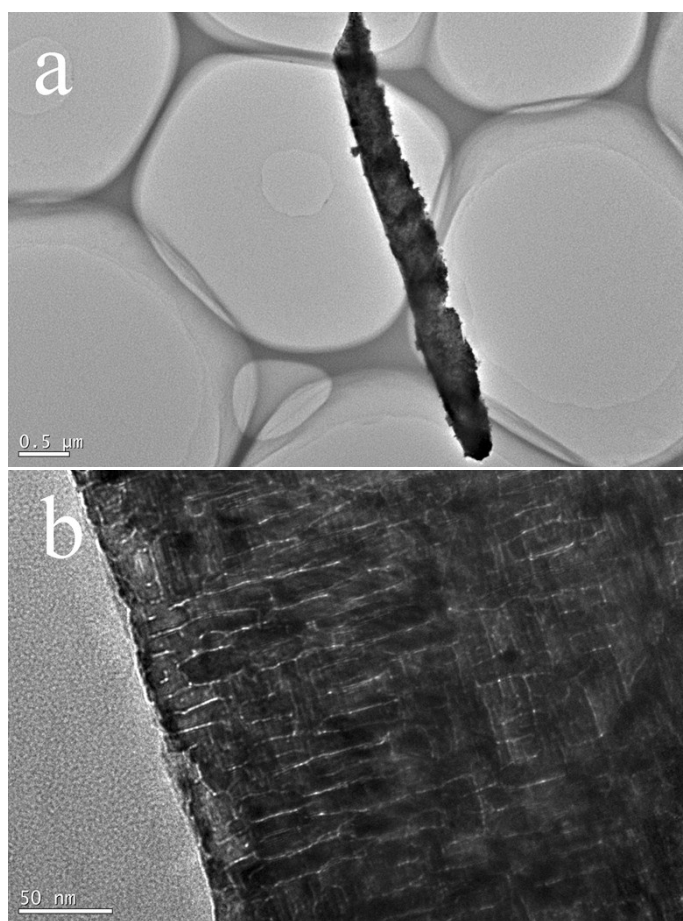

**Figure S5.** (a, b) TEM images of CeO<sub>2</sub> nanorods taken from sample S<sub>5</sub>.
